# Supplementary material for: Antimicrobial Stewardship Programmes in Community Healthcare Organisations in England: A Cross-Sectional Survey to Assess Implementation of Programmes and National Toolkits
Source: PubMed Central journal article supplement (PMC6316239; doi:10.3390/antibiotics7040097), 2018-11-07
Supplement: antibiotics-07-00097-s001.pdf [file antibiotics-07-00097-s001.pdf]

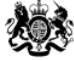

## Public Health England

### Antimicrobial Stewardship Survey for Community Health Services Trusts

You are invited to complete the following survey on antimicrobial stewardship (AMS) in Community Health Services (CHS) NHS Trusts.

The aim of the survey is to provide an understanding of current AMS practices in community hospitals and is the first step in developing a tool for community hospitals.

Implementation of AMS principles as demonstrated by national AMS toolkits, can help organisations to ensure compliance with the Health and Social Care Act 2008: Code of Practice on the prevention and control of infections and related guidance. Implementation also supports recommendations made in the NICE AMS guidance; Antimicrobial stewardship: systems and processes for effective antimicrobial medicine use (NG15), which was published in August 2015.

This survey is part of a PhD research project by Mary Akpan (University of Hertfordshire) in collaboration with Public Health England. The survey should take about 20 to 25 minutes to complete.

Thank you for your time.

(Please contact [diane.ashiru-oredope@phe.gov.uk](mailto:diane.ashiru-oredope@phe.gov.uk) for any further information)

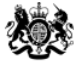

## Public Health England

### Antimicrobial Stewardship Survey for Community Health Services Trusts

#### About your hospital

- Please select the name of your CHS Trust\*
- Please provide the postcode of your CHS Trust (Main Office).\*
- Please provide your name\*  
 This information will not be published or shared with any third party.
- Please provide your email address\*  
 This information will not be published or shared with any third party
- What is your position in the CHS Trust?\*
  - Head of Medicines Management
  - Clinical Pharmacist AfC 6/7
  - Clinical Pharmacist AfC 8a
  - Pharmacist AfC 8b/c
  - Other, please specify
- How many community hospitals are managed by your CHS Trust?
- Approximately, how many inpatient beds are there in your CHS Trust?
- Which of the following services are offered by your CHS Trust?  
 Please select all that apply
  - Addictions Management
  - Day Care Services (Social)
  - Day Surgery

- DayTreatments
- Dentistry
- Diagnostics
- Elective Surgery
- GP Services
- Learning Disabilities
- Maternity
- Mental health
- Minor Injury and Illness Centre
- Offender's Care
- Older Adults
- Outpatients
- Palliative Care
- Physiotherapy Services
- Podiatry
- Rehabilitation
- Sexual Health
- Walk in Centre
- Other, please specify

9. Please indicate the kinds of bed available in your CHS Trust.

Please select all that apply

- Inpatient step up beds
- Inpatient step down beds
- Mental health care beds
- Other, please specify

10. Which CCG commissions your CHS Trust (both inpatient and community)?\*

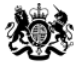

Public Health  
England

## Antimicrobial Stewardship Survey for Community Health Services Trusts

### Antimicrobial Pharmacist

11. How many pharmacists work in your CHS Trust (whole time equivalents)?

12. Is there a substantive pharmacy post(s) focused on antimicrobial stewardship in your CHS Trust?\*

- Yes
- No

13. How is the antimicrobial pharmacist post(s) graded?

Please select all that apply

- Pharmacy Technician - band 4
- Pharmacy Technician - band 5
- Pharmacist - band 6
- Pharmacist - band 7
- Pharmacist - band 8a
- Pharmacist - band 8b
- Pharmacist - band 8c
- Consultant Pharmacist
- Other, please specify

14. How much time in whole time equivalents (WTE) is dedicated to antimicrobial stewardship per week?

- ≤ 0.1
- 0.2 - 0.3
- 0.4 - 0.7
- 0.8 - 1.0
- > 1.0
- Other, please specify

15. You've indicated that there isn't a substantive pharmacy post focused on antimicrobial stewardship in your CHS Trust.

Does anyone else therefore have remit for antimicrobial stewardship?\*

- Yes
- No
- Don't know

16. Please state who has remit for antimicrobial stewardship (job title of the postholder)?

17. What is the AFC band of the postholder?\*

- Band 6  
 Band 7  
 Band 8a  
 Band 8b  
 Band 8c  
 Band 9  
 Other, please specify

18. How much time in whole time equivalents (WTE) is dedicated by the postholder to antimicrobial stewardship?

- ≤ 0.1  
 0.2 - 0.3  
 0.4 - 0.7  
 0.8 - 1.0  
 > 1.0  
 Other, please specify

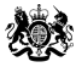

Public Health  
England

### Antimicrobial Stewardship Survey for Community Health Services Trusts

#### Your Antimicrobial Policy

19. Does your CHS Trust have a dedicated antimicrobial policy/management code, which details your overarching strategies for ensuring appropriate antimicrobial usage?\*

- Yes  
 No  
 Don't know

20. If yes, when was it put in place?

21. When was the antimicrobial policy last reviewed?

22. How often is the antimicrobial policy reviewed?

- Twice yearly  
 Once a year  
 Every 2 years  
 Every 3 years +  
 Never  
 Other, please specify

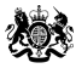

Public Health  
England

### Antimicrobial Stewardship Survey for Community Health Services Trusts

#### Antimicrobial Stewardship

23. Does your CHS Trust have an antimicrobial stewardship committee/group?\*

- Yes  
 No

24. What professional groups are represented by your antimicrobial stewardship committee?

Please select all that apply

- CAMH Specialist  
 Elderly Care Physician  
 General Physician (GP)  
 Junior Doctor  
 Infectious Disease Specialist  
 Mental Health Specialist  
 Neurologist  
 Paediatrician  
 Specialist Physician  
 Chief Pharmacist  
 General Pharmacist  
 Specialist Antimicrobial Pharmacist

- Infection Control Nurse
- Nurse
- CCG Representative
- Hospital Manager/Matron
- Microbiologist
- Podiatrist/Chiropodist
- Don't know
- Not Applicable
- Other, please specify

25. Do you have laymember representation in your antimicrobial stewardship committee?

- Yes
- No
- Don't know

26. Does the antimicrobial stewardship committee/group in your CHT Trust have the following?

|                                                                                        | Yes                   | No                    | Don't know            |
|----------------------------------------------------------------------------------------|-----------------------|-----------------------|-----------------------|
| Terms of Reference                                                                     | <input type="radio"/> | <input type="radio"/> | <input type="radio"/> |
| Minutes or Action Lists                                                                | <input type="radio"/> | <input type="radio"/> | <input type="radio"/> |
| Minutes which go to Clinical Governance/Infection Control/drug & therapeutic committee | <input type="radio"/> | <input type="radio"/> | <input type="radio"/> |

27. You've indicated that your CHS Trust does not have an antimicrobial stewardship committee/group.

Please indicate which committee(s) therefore has the written remit for antimicrobial stewardship in your CHS Trust?

Please select all that apply

- Infection Prevention and Control Committee
- Drugs and Therapeutics Committee
- Medicine Management Committee
- Don't know
- None
- Other, please specify

28. Which of the following guidelines/policies are in place in your CHS Trust?\*

Please select all that apply

- Antimicrobial Formulary
- Empirical Antibiotic Guidelines
- Reserved Antimicrobial List
- Intravenous to oral switch
- Surgical Antimicrobial Prophylaxis Guidelines
- Automatic Stop Policy
- Separate Antimicrobial Drug Chart/Section
- Out-patient Parenteral Therapy (OPAT)
- Don't know
- Other, please specify

29. Who are the prescribers in your CHS Trust?\*

Please select all that apply

- Consultants
- General Practitioners
- Junior Doctors
- Mental Health Doctors
- Nurses
- Podiatrists/Chiropodists
- Optometrists
- Physiotherapists
- Pharmacists
- Other, please specify

30. Which of the following applies to the prescribers in your CHS Trust?

Please select all that apply

- They are CHS Employees
- They are contracted to come, review and prescribe for your patients
- Don't know
- Other, please specify

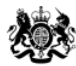

Public Health  
England

Antimicrobial Stewardship Survey for Community Health Services Trusts

National Antimicrobial Stewardship Guidelines

31. Are you aware of the national AMS toolkit TARGET (Treat Antibiotics Responsibly, Guidance, Education, Tools)?\*

- Yes
- No

32. Please indicate what actions have been taken by your CHS Trust with regards to the national AMS toolkit TARGET?

\*

|                                                                                                     | Yes                   | No                    | Don't know            |
|-----------------------------------------------------------------------------------------------------|-----------------------|-----------------------|-----------------------|
| Informally reviewed                                                                                 | <input type="radio"/> | <input type="radio"/> | <input type="radio"/> |
| Formally reviewed                                                                                   | <input type="radio"/> | <input type="radio"/> | <input type="radio"/> |
| Written action plan in place within antimicrobial policy/management code                            | <input type="radio"/> | <input type="radio"/> | <input type="radio"/> |
| Action plan implemented within Antimicrobial policy/management code                                 | <input type="radio"/> | <input type="radio"/> | <input type="radio"/> |
| Implemented audits suggested by the audit plan within the national AMS toolkit                      | <input type="radio"/> | <input type="radio"/> | <input type="radio"/> |
| Data collated as part of organisation-wide point prevalence surveys(PPS)                            | <input type="radio"/> | <input type="radio"/> | <input type="radio"/> |
| Promote the use of the national AMS toolkit to prescribers for CPD/revalidation                     | <input type="radio"/> | <input type="radio"/> | <input type="radio"/> |
| Promote the use of the national AMS toolkit within practice prescribing visits or teaching sessions | <input type="radio"/> | <input type="radio"/> | <input type="radio"/> |

33. Are you aware of the national AMS toolkit SSTF (Start Smart Then Focus)?\*

- Yes
- No

34. Please indicate what actions have been taken by your CHS Trust with regards to the national AMS toolkit SSTF?

\*

|                                                                                                     | Yes                   | No                    | Don't know            |
|-----------------------------------------------------------------------------------------------------|-----------------------|-----------------------|-----------------------|
| Informally reviewed                                                                                 | <input type="radio"/> | <input type="radio"/> | <input type="radio"/> |
| Formally reviewed                                                                                   | <input type="radio"/> | <input type="radio"/> | <input type="radio"/> |
| Written action plan in place within antimicrobial policy/management code                            | <input type="radio"/> | <input type="radio"/> | <input type="radio"/> |
| Action plan implemented within Antimicrobial policy/management code                                 | <input type="radio"/> | <input type="radio"/> | <input type="radio"/> |
| Implemented audits suggested by the audit plan within the national AMS toolkit                      | <input type="radio"/> | <input type="radio"/> | <input type="radio"/> |
| Data collated as part of organisation-wide point prevalence surveys(PPS)                            | <input type="radio"/> | <input type="radio"/> | <input type="radio"/> |
| Promote the use of the national AMS toolkit to prescribers for CPD/revalidation                     | <input type="radio"/> | <input type="radio"/> | <input type="radio"/> |
| Promote the use of the national AMS toolkit within practice prescribing visits or teaching sessions | <input type="radio"/> | <input type="radio"/> | <input type="radio"/> |

35. Are you aware of the NICE Guidance: Antimicrobial Stewardship: Systems and processes for effective antimicrobial medicine use (NG15, August 2015)?\*

- Yes
- No
- Don't know

36. Have you completed the baseline assessment tool which accompanies the NICE AMS guideline?\*

- Yes
- No
- Don't know

37. If you have answered 'NO' to any of the relevant questions within the baseline assessment tool, have you developed an action plan?\*

- Yes
- No
- Don't know

38. Has this action plan been implemented?\*

- Yes
- No
- Don't know

39. In your CHS Trust, is it mandatory to document indication, duration, review and stop dates of antibiotics on drug charts?

|                          | Yes                   | No                    | Don't know            |
|--------------------------|-----------------------|-----------------------|-----------------------|
| Indication               | <input type="radio"/> | <input type="radio"/> | <input type="radio"/> |
| Patient's allergy status | <input type="radio"/> | <input type="radio"/> | <input type="radio"/> |
| Treatment Duration       | <input type="radio"/> | <input type="radio"/> | <input type="radio"/> |
| Review Date              | <input type="radio"/> | <input type="radio"/> | <input type="radio"/> |
| Stop Date                | <input type="radio"/> | <input type="radio"/> | <input type="radio"/> |

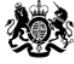

Public Health  
England

### Antimicrobial Stewardship Survey for Community Health Services Trusts

#### Assessment of Effectiveness of Antimicrobial Stewardship

40. Which of the following outcomes are used to assess antimicrobial stewardship in your CHS Trust? \*

Please select all that apply

- Total quantity of antimicrobial use in DDD (defined daily dose)
- Quantity of targeted antimicrobials in DDD
- Cost savings from all antibiotics
- Cost savings from targeted antibiotic class
- Percentage/number of multi-drug resistant organisms (MRSA, ESBL, Pseudomonas etc)
- Percentage/number of organisms resistant to certain antimicrobials
- Rate of C. difficile infection
- Clinical cure/improvement
- Rate of adverse antimicrobial reactions and interactions
- Other, please specify

41. Have you collected patient level audit/quality improvement data relating to antimicrobial stewardship within your CHS Trust in the last year?\*

- Yes
- No
- Don't know

42. How frequently were audits/surveys/data collection on hospital antimicrobial stewardship carried out in the past year (Jan-Dec 2015)?

- Weekly
- Monthly
- Quaterly
- Twice a year
- Yearly
- Don't know
- Other, please specify

43. Please provide details of the audits which have been carried out in your CHS Trust?

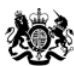

Public Health  
England

### Antimicrobial Stewardship Survey for Community Health Services Trusts

#### Education and Training

44. What antimicrobial prescribing and stewardship training takes place within the CHS Trust?

Please select to indicate whether the following antimicrobial and stewardship training takes place within your CHS. Blank = training does not take place

|                             | Doctors                  | Nurses                   | Pharmacists              | Non-Medical Prescribers  |
|-----------------------------|--------------------------|--------------------------|--------------------------|--------------------------|
| Teaching on induction       | <input type="checkbox"/> | <input type="checkbox"/> | <input type="checkbox"/> | <input type="checkbox"/> |
| Antibiotic guidelines given | <input type="checkbox"/> | <input type="checkbox"/> | <input type="checkbox"/> | <input type="checkbox"/> |
| E-learning module optional  | <input type="checkbox"/> | <input type="checkbox"/> | <input type="checkbox"/> | <input type="checkbox"/> |
| E-learning module mandatory | <input type="checkbox"/> | <input type="checkbox"/> | <input type="checkbox"/> | <input type="checkbox"/> |
| No training provided        | <input type="checkbox"/> | <input type="checkbox"/> | <input type="checkbox"/> | <input type="checkbox"/> |

45. Please provide information about any other antimicrobial prescribing and stewardship training which takes place in your CHS Trust.

46.

**Select file to upload:**

(click "Browse" button below to locate file)

File size restricted to: 3000 KB

File type restricted to: No file type restrictions.

Choose file

No file chosen

Upload

File Name: (limit 255 characters)

File Description: (limit 255 characters)

Files Uploaded:

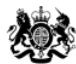

Public Health  
England

## Antimicrobial Stewardship Survey for Community Health Services Trusts

### Clinical Decision Support

47. Does your CHS Trust have electronic prescribing for inpatients?\*

 Yes No

48. Is there any clinical decision support about antimicrobial use built into any of the electronic prescribing software?\*

Clinical decision support = Electronic system to assist prescribers in the prescribing process and to therefore ensure correct and efficient prescribing of antimicrobials.

 Yes No

49. What kind of clinical decision support about antimicrobial use does the electronic prescribing software provide?

Please select all that apply

 Advice about the choice of antimicrobial Advice about the dose of antimicrobial Advice about the antimicrobial treatment duration Trigger of patient's allergy status Information about the cost of the antimicrobial Information about whether or not the antimicrobial is on the formulary Other, please specify

50. Does the CHS Trust currently work collaboratively with any of the following to deliver antimicrobial stewardship?

Please select all that apply

 Acute service provider Other Community service provider Private care provider GP Practice Mental Health provider Ambulance service Community Pharmacy Urgent care provider Out of hours provider General Practice representation Patient representation Veterinary Public Health - Local Authority PHE Centres Don't know Other, please specify

51. Thank you very much for taking time to answer this survey. Please use this section if you would like to make any comments on this survey or the subject covered.
